# Supplementary material for: Rapidly Identifying New Coronavirus Mutations of Potential Concern in the Omicron Variant Using an Unsupervised Learning Strategy
Source: PubMed Central journal article supplement (PMC8887078; doi:10.21203/rs.3.rs-1280819/v1), 2022-02-25
Supplement: 8852f1e2fa060178995a47b9.pdf [file 8852f1e2fa060178995a47b9.pdf]

Table S1. Descriptive table of SNV numbers by continent/country/region/sub-region around the number, 1st quartile, median, mean, 3rd quartile and maximum number of mutations on each v

| <b>Continent/Country/Region/Sub-region</b>                         |
|--------------------------------------------------------------------|
| 1 Africa/Botswana/Gaborone                                         |
| 2 Africa/Botswana/Lobatse                                          |
| 3 Africa/Botswana/Otse                                             |
| 4 Africa/Botswana/Palapye                                          |
| 5 Africa/Botswana/South East/Greater Gaborone/Gaborone             |
| 6 Africa/Botswana/South East/Greater Gaborone/Lobatse              |
| 7 Africa/Botswana/South East/Greater Gaborone/Mochudi              |
| 8 Africa/Botswana/South East/Greater Gaborone/Oodi                 |
| 9 Africa/Botswana/South East/Greater Gaborone/Ramotswa             |
| 10 Africa/Ghana/Accra                                              |
| 11 Africa/Malawi/Blantyre                                          |
| 12 Africa/Nigeria/Abuja                                            |
| 13 Africa/Reunion                                                  |
| 14 Africa/Senegal/Dakar/Iressef Diamniadio                         |
| 15 Africa/Senegal/Dakar/IRESEF DIAMNIADIO                          |
| 16 Africa/Sierra Leone                                             |
| 17 Africa/South Africa                                             |
| 18 Africa/South Africa/Eastern Cape                                |
| 19 Africa/South Africa/Eastern Cape/Nelson Mandela Bay             |
| 20 Africa/South Africa/Eastern Cape/Sarah Baartman                 |
| 21 Africa/South Africa/Free State                                  |
| 22 Africa/South Africa/Gauteng                                     |
| 23 Africa/South Africa/Gauteng/City of Johannesburg Metro          |
| 24 Africa/South Africa/Gauteng/City of Johannesburg Metro Region A |
| 25 Africa/South Africa/Gauteng/City of Johannesburg Metro Region B |
| 26 Africa/South Africa/Gauteng/City of Johannesburg Metro Region C |
| 27 Africa/South Africa/Gauteng/City of Johannesburg Metro Region E |
| 28 Africa/South Africa/Gauteng/City of Johannesburg Metro Region F |
| 29 Africa/South Africa/Gauteng/Sedibeng                            |
| 30 Africa/South Africa/Gauteng/Tshwane                             |
| 31 Africa/South Africa/Kwazulu-Natal                               |
| 32 Africa/South Africa/KwaZulu-Natal                               |
| 33 Africa/South Africa/KwaZulu-Natal/eThekweni                     |
| 34 Africa/South Africa/KwaZulu-Natal/Ilembe                        |
| 35 Africa/South Africa/KwaZulu-Natal/King Cetshwayo                |
| 36 Africa/South Africa/KwaZulu-Natal/Ugu                           |
| 37 Africa/South Africa/KwaZulu-Natal/uMkhanyakude                  |
| 38 Africa/South Africa/KwaZulu-Natal/Zululand                      |
| 39 Africa/South Africa/Limpopo                                     |
| 40 Africa/South Africa/Mpumalanga                                  |
| 41 Africa/South Africa/North West                                  |

- 42 Africa/South Africa/Northern Cape
- 43 Africa/South Africa/Western Cape
- 44 Africa/South Africa/Western Cape Province/Cape Town Metro
- 45 Asia/Bangladesh/Dhaka/Dhaka
- 46 Asia/Hong Kong
- 47 Asia/India/Delhi
- 48 Asia/India/Gujarat/Jamnagar
- 49 Asia/India/Karnataka
- 50 Asia/India/Maharashtra/Pune
- 51 Asia/India/New Delhi
- 52 Asia/Israel
- 53 Asia/Japan
- 54 Asia/Jordan/Amman
- 55 Asia/Malaysia/Selangor
- 56 Asia/Maldives/Sandies Bathala resort
- 57 Asia/Nepal/Bagmati
- 58 Asia/Pakistan
- 59 Asia/Singapore
- 60 Asia/South Korea
- 61 Asia/Sri Lanka/Marawila
- 62 Asia/Thailand/Bangkok/Bangrak
- 63 Asia/Thailand/Bangkok/Nongkhaem
- 64 Europe/Austria/Burgenland
- 65 Europe/Austria/Lower Austria
- 66 Europe/Austria/Lower Austria/Bruck an der Leitha/Schwechat
- 67 Europe/Austria/Tyrol/Schwaz
- 68 Europe/Austria/Tyrol/Schwaz/Vomp
- 69 Europe/Austria/Upper Austria/VÃ¶cklabruck/St. Georgen im Attergau
- 70 Europe/Austria/Vienna
- 71 Europe/Belgium
- 72 Europe/Belgium/Antwerpen
- 73 Europe/Belgium/Beersel
- 74 Europe/Belgium/Brabant Wallon
- 75 Europe/Belgium/Brussels
- 76 Europe/Belgium/Brussels Capital Region
- 77 Europe/Belgium/Flemish Brabant
- 78 Europe/Belgium/Geel
- 79 Europe/Belgium/Ghent
- 80 Europe/Belgium/Hainaut
- 81 Europe/Belgium/Jette
- 82 Europe/Belgium/Liege
- 83 Europe/Belgium/Limburg
- 84 Europe/Belgium/Meerhout
- 85 Europe/Belgium/Namur
- 86 Europe/Belgium/Putte
- 87 Europe/Belgium/Sint-agatha-berchem
- 88 Europe/Belgium/Sint-Agatha-Berchem

- 89 Europe/Belgium/Sint-Pieters-Leeuw
- 90 Europe/Belgium/Vlamertinge
- 91 Europe/Belgium/Wallonie/Hainaut/Enghien
- 92 Europe/Belgium/Wilrijk
- 93 Europe/Croatia/The City of Zagreb
- 94 Europe/Croatia/Zagreb County
- 95 Europe/Czech Republic/Liberec Region/Rynoltice
- 96 Europe/Czech Republic/South Moravian Region/Adamov
- 97 Europe/Czech Republic/South Moravian Region/Brno
- 98 Europe/Czech Republic/South Moravian Region/Slavkov u Brna
- 99 Europe/Denmark
- 100 Europe/Denmark/Hovedstaden
- 101 Europe/Denmark/Midtjylland
- 102 Europe/Denmark/Nordjylland
- 103 Europe/Denmark/Sjaelland
- 104 Europe/Denmark/Syddanmark
- 105 Europe/Finland
- 106 Europe/France/Auvergne-Rhone-Alpes/Clermont Ferrand
- 107 Europe/France/Auvergne-Rhone-Alpes/Haute-Savoie
- 108 Europe/France/Auvergne-Rhone-Alpes/Thonon les bains
- 109 Europe/France/Bretagne/Rennes
- 110 Europe/France/Centre-Val de Loire/Eure-et-Loir
- 111 Europe/France/Centre-Val de Loire/Luisant
- 112 Europe/France/Ile-de-France
- 113 Europe/France/Nouvelle-Aquitaine
- 114 Europe/France/Nouvelle-Aquitaine/Bordeaux
- 115 Europe/France/Pays de loire/La roche sur yon
- 116 Europe/France/Provence-Alpes-Cote d Azur
- 117 Europe/France/Provence-Alpes-Cote d'Azur
- 118 Europe/France/Provence-Alpes-Cote d'Azur/Alpes-Maritimes
- 119 Europe/Germany/Baden-Wurttemberg
- 120 Europe/Germany/Bavaria
- 121 Europe/Germany/Bavaria/Munich
- 122 Europe/Germany/Berlin
- 123 Europe/Germany/Berlin/Berlin
- 124 Europe/Germany/Brandenburg
- 125 Europe/Germany/Hamburg
- 126 Europe/Germany/Hesse
- 127 Europe/Germany/Lower Saxony
- 128 Europe/Germany/North Rhine-Westphalia
- 129 Europe/Germany/North Rhine-Westphalia/Düsseldorf Health department
- 130 Europe/Germany/Saxony
- 131 Europe/Germany/Schleswig-Holstein
- 132 Europe/Germany/Thuringia
- 133 Europe/Gibraltar
- 134 Europe/Greece
- 135 Europe/Ireland/Dublin

136 Europe/Ireland/Longford  
137 Europe/Ireland/Meath  
138 Europe/Italy/Calabria  
139 Europe/Italy/Campania  
140 Europe/Italy/Lombardia  
141 Europe/Italy/Piemonte  
142 Europe/Italy/Puglia  
143 Europe/Italy/Trentino-Alto Adige  
144 Europe/Liechtenstein  
145 Europe/Netherlands/Gelderland  
146 Europe/Netherlands/Noord-Holland  
147 Europe/Netherlands/Noord-Holland/Amsterdam  
148 Europe/Netherlands/Utrecht  
149 Europe/Netherlands/Zeeland/Tholen  
150 Europe/Norway/Oslo  
151 Europe/Norway/Vestland  
152 Europe/Norway/Viken  
153 Europe/Portugal  
154 Europe/Romania/Bucuresti  
155 Europe/Russia/Moscow  
156 Europe/Slovakia/Nitra  
157 Europe/Slovakia/Presov  
158 Europe/Spain/Albacete  
159 Europe/Spain/Balearic Island  
160 Europe/Spain/Basque Country/Donostia-San Sebastian  
161 Europe/Spain/Castilla-La Mancha/Ciudad Real  
162 Europe/Spain/Catalunya  
163 Europe/Spain/Catalunya/Barcelona  
164 Europe/Spain/Catalunya/Girona  
165 Europe/Spain/Galicia/Vigo  
166 Europe/Spain/Madrid  
167 Europe/Sweden/Jonkopings lan  
168 Europe/Sweden/Skane  
169 Europe/Sweden/Stockholm  
170 Europe/Switzerland/Aargau  
171 Europe/Switzerland/Basel-Landschaft  
172 Europe/Switzerland/Basel-Stadt  
173 Europe/Switzerland/Bern  
174 Europe/Switzerland/BL  
175 Europe/Switzerland/BS  
176 Europe/Switzerland/Geneva  
177 Europe/Switzerland/Solothurn  
178 Europe/Switzerland/Thurgau  
179 Europe/Switzerland/Vaud  
180 Europe/Switzerland/Zug  
181 Europe/Switzerland/Zurich  
182 Europe/Turkey

183 Europe/United Kingdom/England  
184 Europe/United Kingdom/Scotland  
185 Europe/United Kingdom/Wales  
186 North America/Canada/Alberta  
187 North America/Canada/British Columbia  
188 North America/Canada/Manitoba  
189 North America/Canada/Ontario  
190 North America/Canada/Quebec  
191 North America/Canada/Saskatchewan  
192 North America/Mexico/Mexico City  
193 North America/Mexico/State of Mexico  
194 North America/Puerto Rico  
195 North America/USA/Alaska/Anchorage-Mat Su  
196 North America/USA/Arizona/Maricopa County  
197 North America/USA/Arizona/Pima County  
198 North America/USA/California  
199 North America/USA/California/Alameda County  
200 North America/USA/California/Los Angeles County  
201 North America/USA/California/San Francisco County  
202 North America/USA/California/West Sacramento  
203 North America/USA/Colorado  
204 North America/USA/Connecticut  
205 North America/USA/Connecticut/Fairfield  
206 North America/USA/Connecticut/Farifield  
207 North America/USA/Connecticut/Hartford County  
208 North America/USA/Connecticut/New Haven  
209 North America/USA/District of Columbia  
210 North America/USA/Florida  
211 North America/USA/Georgia  
212 North America/USA/Hawaii  
213 North America/USA/Hawaii/Honolulu County  
214 North America/USA/Idaho  
215 North America/USA/Illinois/Cook County/Chicago  
216 North America/USA/Iowa  
217 North America/USA/Louisiana  
218 North America/USA/Louisiana/Caddo Parish  
219 North America/USA/Louisiana/Orleans  
220 North America/USA/Louisiana/St Tammany  
221 North America/USA/Maryland  
222 North America/USA/Massachusetts  
223 North America/USA/Massachusetts/Middlesex County  
224 North America/USA/Michigan  
225 North America/USA/Minnesota  
226 North America/USA/Mississippi  
227 North America/USA/Missouri  
228 North America/USA/Nebraska  
229 North America/USA/New Jersey

230 North America/USA/New York  
231 North America/USA/New York/New York City  
232 North America/USA/New York/Oneida  
233 North America/USA/New York/Suffolk  
234 North America/USA/New York/Westchester  
235 North America/USA/Ohio  
236 North America/USA/Oregon/Multnomah County  
237 North America/USA/Oregon/Washington County  
238 North America/USA/Pennsylvania  
239 North America/USA/Rhode Island  
240 North America/USA/Tennessee  
241 North America/USA/Texas  
242 North America/USA/Texas/Ellis  
243 North America/USA/Texas/Houston  
244 North America/USA/Texas/Houston County  
245 North America/USA/Texas/San Antonio County  
246 North America/USA/Texas/Tarrant County  
247 North America/USA/Utah  
248 North America/USA/Virginia  
249 North America/USA/Washington  
250 North America/USA/Washington/King County  
251 North America/USA/Washington/Whatcom County  
252 North America/USA/Wisconsin  
253 North America/USA/Wisconsin/Milwaukee County  
254 Oceania/Australia/Australian Capital Territory  
255 Oceania/Australia/New South Wales/Sydney  
256 Oceania/Australia/Northern Territory  
257 Oceania/Australia/Queensland  
258 South America/Argentina/San Luis  
259 South America/Brazil/Distrito Federal/Brasilia  
260 South America/Brazil/Federal District/Brasilia  
261 South America/Brazil/Rio Grande do Sul/Santa Cruz do Sul  
262 South America/Brazil/SÃ£o Paulo  
263 South America/Brazil/Sao Paulo  
264 South America/Brazil/Sao Paulo/Guarulhos  
265 South America/Brazil/Sao Paulo/Limeira

---

world: number of reported viruses, minimum  
 iral genome

| <b>Freq</b> | <b>Min</b> | <b>1st</b> | <b>Median</b> | <b>Mean</b> | <b>3rd</b> | <b>Max</b> |
|-------------|------------|------------|---------------|-------------|------------|------------|
| 17          | 14         | 26         | 26            | 26.35       | 30         | 30         |
| 1           | 31         | 31         | 31            | 31.00       | 31         | 31         |
| 1           | 26         | 26         | 26            | 26.00       | 26         | 26         |
| 3           | 30         | 30         | 30            | 30.00       | 30         | 30         |
| 52          | 12         | 28         | 30            | 28.13       | 31         | 38         |
| 2           | 28         | 28.25      | 28.5          | 28.50       | 28.75      | 29         |
| 1           | 29         | 29         | 29            | 29.00       | 29         | 29         |
| 1           | 21         | 21         | 21            | 21.00       | 21         | 21         |
| 1           | 16         | 16         | 16            | 16.00       | 16         | 16         |
| 33          | 29         | 29         | 30            | 30.12       | 31         | 32         |
| 3           | 30         | 30.5       | 31            | 31.00       | 31.5       | 32         |
| 11          | 28         | 30         | 30            | 30.00       | 30.5       | 31         |
| 2           | 29         | 29.25      | 29.5          | 29.50       | 29.75      | 30         |
| 1           | 15         | 15         | 15            | 15.00       | 15         | 15         |
| 6           | 29         | 29.25      | 30.5          | 31.00       | 32.5       | 34         |
| 1           | 29         | 29         | 29            | 29.00       | 29         | 29         |
| 6           | 24         | 26         | 29.5          | 28.33       | 30.75      | 31         |
| 23          | 28         | 30         | 30            | 30.57       | 31         | 35         |
| 8           | 28         | 29         | 30            | 29.88       | 30         | 33         |
| 6           | 30         | 30.25      | 31            | 30.67       | 31         | 31         |
| 11          | 25         | 28.5       | 29            | 29.18       | 30         | 32         |
| 257         | 18         | 29         | 29            | 29.30       | 30         | 34         |
| 2           | 29         | 29.25      | 29.5          | 29.50       | 29.75      | 30         |
| 2           | 29         | 29         | 29            | 29.00       | 29         | 29         |
| 4           | 29         | 29         | 29            | 29.25       | 29.25      | 30         |
| 6           | 29         | 29         | 29.5          | 29.50       | 30         | 30         |
| 14          | 29         | 29         | 29.5          | 29.64       | 30         | 32         |
| 21          | 29         | 29         | 29            | 29.67       | 30         | 31         |
| 4           | 28         | 29.5       | 30.5          | 30.00       | 31         | 31         |
| 27          | 27         | 29         | 30            | 30.00       | 30         | 39         |
| 1           | 23         | 23         | 23            | 23.00       | 23         | 23         |
| 90          | 23         | 29         | 30            | 30.09       | 31         | 34         |
| 42          | 29         | 30         | 31            | 30.95       | 32         | 33         |
| 6           | 29         | 29.25      | 30            | 30.00       | 30.75      | 31         |
| 40          | 22         | 29         | 30            | 30.35       | 32         | 35         |
| 10          | 30         | 30         | 31            | 30.80       | 31         | 33         |
| 3           | 29         | 29.5       | 30            | 29.67       | 30         | 30         |
| 13          | 28         | 31         | 31            | 31.15       | 32         | 34         |
| 6           | 29         | 29.25      | 30            | 30.00       | 30.75      | 31         |
| 35          | 22         | 27.5       | 28            | 28.37       | 30.5       | 32         |
| 30          | 26         | 29         | 29.5          | 29.43       | 30.75      | 32         |

|     |    |       |      |       |       |    |
|-----|----|-------|------|-------|-------|----|
| 37  | 20 | 28    | 29   | 28.32 | 29    | 32 |
| 39  | 27 | 29    | 30   | 29.79 | 30    | 32 |
| 157 | 23 | 29    | 29   | 29.36 | 30    | 33 |
| 2   | 29 | 29.25 | 29.5 | 29.50 | 29.75 | 30 |
| 18  | 29 | 29    | 29.5 | 29.78 | 30.75 | 31 |
| 2   | 29 | 29.5  | 30   | 30.00 | 30.5  | 31 |
| 1   | 46 | 46    | 46   | 46.00 | 46    | 46 |
| 2   | 30 | 30    | 30   | 30.00 | 30    | 30 |
| 1   | 32 | 32    | 32   | 32.00 | 32    | 32 |
| 1   | 30 | 30    | 30   | 30.00 | 30    | 30 |
| 67  | 19 | 29    | 30   | 29.24 | 31    | 32 |
| 7   | 30 | 30    | 32   | 31.29 | 32    | 33 |
| 2   | 29 | 29.25 | 29.5 | 29.50 | 29.75 | 30 |
| 1   | 20 | 20    | 20   | 20.00 | 20    | 20 |
| 1   | 22 | 22    | 22   | 22.00 | 22    | 22 |
| 2   | 29 | 29    | 29   | 29.00 | 29    | 29 |
| 1   | 29 | 29    | 29   | 29.00 | 29    | 29 |
| 13  | 29 | 30    | 31   | 31.15 | 31    | 35 |
| 9   | 29 | 30    | 30   | 29.89 | 30    | 30 |
| 2   | 21 | 23.75 | 26.5 | 26.50 | 29.25 | 32 |
| 1   | 26 | 26    | 26   | 26.00 | 26    | 26 |
| 2   | 32 | 32.25 | 32.5 | 32.50 | 32.75 | 33 |
| 2   | 26 | 27    | 28   | 28.00 | 29    | 30 |
| 5   | 29 | 29    | 32   | 31.20 | 33    | 33 |
| 2   | 30 | 30    | 30   | 30.00 | 30    | 30 |
| 1   | 29 | 29    | 29   | 29.00 | 29    | 29 |
| 3   | 29 | 29    | 29   | 29.00 | 29    | 29 |
| 1   | 31 | 31    | 31   | 31.00 | 31    | 31 |
| 3   | 30 | 30    | 30   | 30.33 | 30.5  | 31 |
| 2   | 30 | 30    | 30   | 30.00 | 30    | 30 |
| 1   | 32 | 32    | 32   | 32.00 | 32    | 32 |
| 1   | 30 | 30    | 30   | 30.00 | 30    | 30 |
| 1   | 30 | 30    | 30   | 30.00 | 30    | 30 |
| 2   | 32 | 32    | 32   | 32.00 | 32    | 32 |
| 11  | 30 | 30    | 31   | 31.18 | 31.5  | 34 |
| 5   | 27 | 28    | 30   | 29.40 | 30    | 32 |
| 1   | 30 | 30    | 30   | 30.00 | 30    | 30 |
| 3   | 29 | 29.5  | 30   | 30.33 | 31    | 32 |
| 29  | 26 | 30    | 30   | 30.10 | 31    | 33 |
| 1   | 34 | 34    | 34   | 34.00 | 34    | 34 |
| 1   | 31 | 31    | 31   | 31.00 | 31    | 31 |
| 1   | 32 | 32    | 32   | 32.00 | 32    | 32 |
| 2   | 30 | 30.25 | 30.5 | 30.50 | 30.75 | 31 |
| 1   | 34 | 34    | 34   | 34.00 | 34    | 34 |
| 5   | 21 | 30    | 30   | 28.60 | 30    | 32 |
| 1   | 25 | 25    | 25   | 25.00 | 25    | 25 |
| 1   | 34 | 34    | 34   | 34.00 | 34    | 34 |



|    |    |       |      |       |       |    |
|----|----|-------|------|-------|-------|----|
| 3  | 29 | 29    | 29   | 29.33 | 29.5  | 30 |
| 1  | 28 | 28    | 28   | 28.00 | 28    | 28 |
| 1  | 32 | 32    | 32   | 32.00 | 32    | 32 |
| 1  | 30 | 30    | 30   | 30.00 | 30    | 30 |
| 1  | 32 | 32    | 32   | 32.00 | 32    | 32 |
| 1  | 32 | 32    | 32   | 32.00 | 32    | 32 |
| 1  | 29 | 29    | 29   | 29.00 | 29    | 29 |
| 2  | 29 | 29.5  | 30   | 30.00 | 30.5  | 31 |
| 1  | 27 | 27    | 27   | 27.00 | 27    | 27 |
| 1  | 29 | 29    | 29   | 29.00 | 29    | 29 |
| 1  | 30 | 30    | 30   | 30.00 | 30    | 30 |
| 46 | 29 | 30    | 31   | 30.67 | 31    | 32 |
| 66 | 29 | 32    | 32   | 31.85 | 32    | 34 |
| 17 | 30 | 32    | 32   | 32.18 | 33    | 34 |
| 4  | 29 | 29.75 | 30.5 | 30.50 | 31.25 | 32 |
| 12 | 23 | 30    | 30   | 29.83 | 30    | 33 |
| 3  | 30 | 30    | 30   | 30.33 | 30.5  | 31 |
| 1  | 26 | 26    | 26   | 26.00 | 26    | 26 |
| 2  | 29 | 29    | 29   | 29.00 | 29    | 29 |
| 1  | 30 | 30    | 30   | 30.00 | 30    | 30 |
| 2  | 28 | 28.25 | 28.5 | 28.50 | 28.75 | 29 |
| 1  | 30 | 30    | 30   | 30.00 | 30    | 30 |
| 1  | 29 | 29    | 29   | 29.00 | 29    | 29 |
| 6  | 30 | 31    | 31   | 31.00 | 31    | 32 |
| 1  | 27 | 27    | 27   | 27.00 | 27    | 27 |
| 1  | 30 | 30    | 30   | 30.00 | 30    | 30 |
| 1  | 29 | 29    | 29   | 29.00 | 29    | 29 |
| 15 | 27 | 30    | 30   | 30.20 | 31    | 31 |
| 3  | 29 | 29.5  | 30   | 29.67 | 30    | 30 |
| 1  | 31 | 31    | 31   | 31.00 | 31    | 31 |
| 6  | 30 | 31    | 31.5 | 31.83 | 32    | 35 |
| 18 | 29 | 29.25 | 30   | 30.44 | 31.75 | 33 |
| 23 | 24 | 30    | 30   | 29.57 | 30    | 33 |
| 1  | 29 | 29    | 29   | 29.00 | 29    | 29 |
| 1  | 31 | 31    | 31   | 31.00 | 31    | 31 |
| 3  | 29 | 29    | 29   | 29.67 | 30    | 31 |
| 7  | 28 | 29    | 30   | 29.86 | 30.5  | 32 |
| 24 | 29 | 29    | 30   | 29.92 | 31    | 32 |
| 4  | 28 | 28.75 | 29.5 | 29.25 | 30    | 30 |
| 6  | 29 | 29    | 29.5 | 30.17 | 30.75 | 33 |
| 3  | 27 | 27    | 27   | 27.00 | 27    | 27 |
| 1  | 27 | 27    | 27   | 27.00 | 27    | 27 |
| 3  | 30 | 30    | 30   | 30.33 | 30.5  | 31 |
| 1  | 32 | 32    | 32   | 32.00 | 32    | 32 |
| 6  | 31 | 33    | 33   | 33.83 | 34.5  | 38 |
| 1  | 28 | 28    | 28   | 28.00 | 28    | 28 |
| 1  | 30 | 30    | 30   | 30.00 | 30    | 30 |

|    |    |       |      |       |       |    |
|----|----|-------|------|-------|-------|----|
| 1  | 30 | 30    | 30   | 30.00 | 30    | 30 |
| 4  | 25 | 28.75 | 30   | 29.00 | 30.25 | 31 |
| 1  | 30 | 30    | 30   | 30.00 | 30    | 30 |
| 3  | 29 | 32    | 35   | 40.00 | 45.5  | 56 |
| 2  | 27 | 28    | 29   | 29.00 | 30    | 31 |
| 2  | 36 | 36.75 | 37.5 | 37.50 | 38.25 | 39 |
| 2  | 28 | 28    | 28   | 28.00 | 28    | 28 |
| 1  | 29 | 29    | 29   | 29.00 | 29    | 29 |
| 1  | 26 | 26    | 26   | 26.00 | 26    | 26 |
| 1  | 32 | 32    | 32   | 32.00 | 32    | 32 |
| 39 | 28 | 29    | 30   | 30.08 | 31    | 33 |
| 21 | 29 | 29    | 31   | 30.71 | 32    | 34 |
| 1  | 29 | 29    | 29   | 29.00 | 29    | 29 |
| 1  | 29 | 29    | 29   | 29.00 | 29    | 29 |
| 19 | 29 | 29    | 29   | 29.05 | 29    | 30 |
| 1  | 29 | 29    | 29   | 29.00 | 29    | 29 |
| 12 | 29 | 29    | 29   | 29.50 | 30    | 31 |
| 23 | 21 | 29    | 31   | 29.96 | 31    | 32 |
| 2  | 30 | 30.25 | 30.5 | 30.50 | 30.75 | 31 |
| 2  | 29 | 29    | 29   | 29.00 | 29    | 29 |
| 2  | 30 | 30    | 30   | 30.00 | 30    | 30 |
| 1  | 30 | 30    | 30   | 30.00 | 30    | 30 |
| 3  | 30 | 30.5  | 31   | 30.67 | 31    | 31 |
| 6  | 19 | 29.5  | 31   | 29.00 | 31    | 33 |
| 1  | 29 | 29    | 29   | 29.00 | 29    | 29 |
| 5  | 28 | 31    | 31   | 30.80 | 32    | 32 |
| 10 | 30 | 31    | 31   | 31.50 | 31.75 | 34 |
| 1  | 30 | 30    | 30   | 30.00 | 30    | 30 |
| 1  | 32 | 32    | 32   | 32.00 | 32    | 32 |
| 2  | 32 | 32.25 | 32.5 | 32.50 | 32.75 | 33 |
| 22 | 30 | 32    | 32.5 | 33.27 | 34.75 | 41 |
| 1  | 30 | 30    | 30   | 30.00 | 30    | 30 |
| 1  | 31 | 31    | 31   | 31.00 | 31    | 31 |
| 14 | 21 | 28.25 | 29.5 | 29.07 | 32    | 33 |
| 2  | 30 | 30.25 | 30.5 | 30.50 | 30.75 | 31 |
| 6  | 30 | 30    | 30.5 | 30.50 | 31    | 31 |
| 2  | 31 | 31    | 31   | 31.00 | 31    | 31 |
| 5  | 28 | 28    | 29   | 29.00 | 30    | 30 |
| 3  | 31 | 31    | 31   | 31.00 | 31    | 31 |
| 8  | 31 | 31    | 31   | 31.00 | 31    | 31 |
| 1  | 29 | 29    | 29   | 29.00 | 29    | 29 |
| 1  | 31 | 31    | 31   | 31.00 | 31    | 31 |
| 1  | 24 | 24    | 24   | 24.00 | 24    | 24 |
| 3  | 30 | 30    | 30   | 30.00 | 30    | 30 |
| 1  | 29 | 29    | 29   | 29.00 | 29    | 29 |
| 16 | 28 | 30    | 31   | 31.13 | 32    | 38 |
| 1  | 30 | 30    | 30   | 30.00 | 30    | 30 |

|      |    |       |      |       |       |    |    |
|------|----|-------|------|-------|-------|----|----|
| 1700 | 27 | 32    | 33   | 33.50 | 35    | 43 |    |
| 412  | 27 | 31    | 32   | 32.22 | 34    | 39 |    |
| 9    | 31 | 32    | 33   | 33.00 | 34    | 36 |    |
| 10   | 24 | 29.25 | 30.5 | 30.10 | 32.75 | 33 | 10 |
| 5    | 30 | 30    | 31   | 30.60 | 31    | 31 | 5  |
| 5    | 30 | 30    | 30   | 30.20 | 30    | 31 | 5  |
| 29   | 23 | 30    | 31   | 32.00 | 32    | 41 | 29 |
| 1    | 30 | 30    | 30   | 30.00 | 30    | 30 | 1  |
| 4    | 29 | 30.5  | 31.5 | 31.25 | 32.25 | 33 | 4  |
| 2    | 31 | 31    | 31   | 31.00 | 31    | 31 |    |
| 1    | 32 | 32    | 32   | 32.00 | 32    | 32 |    |
| 1    | 29 | 29    | 29   | 29.00 | 29    | 29 |    |
| 1    | 24 | 24    | 24   | 24.00 | 24    | 24 | 1  |
| 5    | 31 | 31    | 31   | 34.00 | 35    | 42 | 5  |
| 1    | 33 | 33    | 33   | 33.00 | 33    | 33 | 1  |
| 4    | 30 | 30    | 30   | 30.25 | 30.25 | 31 | 4  |
| 4    | 26 | 29    | 30   | 29.00 | 30    | 30 | 4  |
| 2    | 30 | 30.5  | 31   | 31.00 | 31.5  | 32 | 2  |
| 1    | 32 | 32    | 32   | 32.00 | 32    | 32 | 1  |
| 1    | 31 | 31    | 31   | 31.00 | 31    | 31 | 1  |
| 2    | 26 | 27    | 28   | 28.00 | 29    | 30 | 2  |
| 3    | 24 | 27.5  | 31   | 28.67 | 31    | 31 | 3  |
| 4    | 30 | 30    | 31   | 31.00 | 32    | 32 | 4  |
| 1    | 30 | 30    | 30   | 30.00 | 30    | 30 | 1  |
| 1    | 30 | 30    | 30   | 30.00 | 30    | 30 | 1  |
| 2    | 30 | 30.25 | 30.5 | 30.50 | 30.75 | 31 | 2  |
| 1    | 23 | 23    | 23   | 23.00 | 23    | 23 | 1  |
| 2    | 30 | 30    | 30   | 30.00 | 30    | 30 | 2  |
| 4    | 29 | 29    | 30   | 30.25 | 31.25 | 32 | 4  |
| 2    | 30 | 30.5  | 31   | 31.00 | 31.5  | 32 | 2  |
| 12   | 30 | 30    | 30   | 30.50 | 31    | 32 | 12 |
| 1    | 30 | 30    | 30   | 30.00 | 30    | 30 | 1  |
| 1    | 30 | 30    | 30   | 30.00 | 30    | 30 | 1  |
| 1    | 31 | 31    | 31   | 31.00 | 31    | 31 | 1  |
| 2    | 29 | 29.75 | 30.5 | 30.50 | 31.25 | 32 | 2  |
| 1    | 31 | 31    | 31   | 31.00 | 31    | 31 | 1  |
| 1    | 32 | 32    | 32   | 32.00 | 32    | 32 | 1  |
| 2    | 27 | 27    | 27   | 27.00 | 27    | 27 | 2  |
| 10   | 27 | 30    | 30   | 29.80 | 30    | 31 | 10 |
| 16   | 29 | 29.75 | 30   | 29.94 | 30    | 32 | 16 |
| 3    | 30 | 30    | 30   | 30.00 | 30    | 30 | 3  |
| 1    | 31 | 31    | 31   | 31.00 | 31    | 31 | 1  |
| 2    | 30 | 30    | 30   | 30.00 | 30    | 30 | 2  |
| 1    | 29 | 29    | 29   | 29.00 | 29    | 29 | 1  |
| 1    | 30 | 30    | 30   | 30.00 | 30    | 30 | 1  |
| 6    | 30 | 31    | 31   | 30.83 | 31    | 31 | 6  |
| 2    | 29 | 29.5  | 30   | 30.00 | 30.5  | 31 | 2  |

|    |    |       |      |       |       |    |     |
|----|----|-------|------|-------|-------|----|-----|
| 5  | 29 | 30    | 30   | 30.00 | 30    | 31 | 5   |
| 10 | 28 | 29    | 30   | 29.70 | 30.75 | 31 | 10  |
| 2  | 23 | 24    | 25   | 25.00 | 26    | 27 | 2   |
| 2  | 25 | 26    | 27   | 27.00 | 28    | 29 | 2   |
| 1  | 31 | 31    | 31   | 31.00 | 31    | 31 | 1   |
| 4  | 30 | 30    | 31   | 31.00 | 32    | 32 | 4   |
| 1  | 32 | 32    | 32   | 32.00 | 32    | 32 | 1   |
| 2  | 30 | 30.25 | 30.5 | 30.50 | 30.75 | 31 | 2   |
| 2  | 28 | 28.75 | 29.5 | 29.50 | 30.25 | 31 | 2   |
| 1  | 30 | 30    | 30   | 30.00 | 30    | 30 | 1   |
| 1  | 23 | 23    | 23   | 23.00 | 23    | 23 | 1   |
| 4  | 31 | 31.75 | 32   | 31.75 | 32    | 32 | 4   |
| 1  | 32 | 32    | 32   | 32.00 | 32    | 32 | 1   |
| 6  | 29 | 32.25 | 33.5 | 32.83 | 34    | 35 | 6   |
| 25 | 32 | 32    | 33   | 33.44 | 34    | 44 | 25  |
| 2  | 34 | 34.5  | 35   | 35.00 | 35.5  | 36 | 2   |
| 1  | 26 | 26    | 26   | 26.00 | 26    | 26 | 1   |
| 4  | 28 | 29.5  | 30.5 | 30.00 | 31    | 31 | 4   |
| 1  | 30 | 30    | 30   | 30.00 | 30    | 30 | 1   |
| 7  | 29 | 30    | 30   | 30.71 | 32    | 32 | 7   |
| 1  | 30 | 30    | 30   | 30.00 | 30    | 30 | 1   |
| 1  | 32 | 32    | 32   | 32.00 | 32    | 32 | 1   |
| 1  | 32 | 32    | 32   | 32.00 | 32    | 32 | 1   |
| 4  | 24 | 28.5  | 30   | 29.25 | 30.75 | 33 | 4   |
| 10 | 29 | 30    | 30   | 30.00 | 30    | 31 | 193 |
| 79 | 19 | 28    | 30   | 28.76 | 30    | 32 |     |
| 1  | 29 | 29    | 29   | 29.00 | 29    | 29 |     |
| 2  | 33 | 34.75 | 36.5 | 36.50 | 38.25 | 40 |     |
| 1  | 30 | 30    | 30   | 30.00 | 30    | 30 |     |
| 1  | 31 | 31    | 31   | 31.00 | 31    | 31 |     |
| 1  | 30 | 30    | 30   | 30.00 | 30    | 30 |     |
| 1  | 30 | 30    | 30   | 30.00 | 30    | 30 |     |
| 1  | 30 | 30    | 30   | 30.00 | 30    | 30 |     |
| 2  | 29 | 29    | 29   | 29.00 | 29    | 29 |     |
| 1  | 30 | 30    | 30   | 30.00 | 30    | 30 |     |
| 1  | 30 | 30    | 30   | 30.00 | 30    | 30 |     |
